# Supplementary material
Source: PubMed Central journal article supplement (PMC10953816)
Supplement: ehp13225.smcontents.508.pdf [file ehp13225.smcontents.508.pdf]

**Note to readers with disabilities:** *EHP* strives to ensure that all journal content is accessible to all readers. However, some figures and Supplemental Material published in *EHP* articles may not conform to [508 standards](#) due to the complexity of the information being presented. If you need assistance accessing journal content, please contact [ehp508@niehs.nih.gov](mailto:ehp508@niehs.nih.gov). Our staff will work with you to assess and meet your accessibility needs within 3 working days.

### **Supplemental Material**

#### **Prenatal Household Air Pollution Exposure and Childhood Blood Pressure in Rural Ghana**

Misbath Daouda, Seyram Kaali, Emma Spring, Mohammed N. Mujtaba, Darby Jack, Rebecca Kyerewaa Dwommoh Prah, Elena Colicino, Theresa Tawiah, Chris Gennings, Musah Osei, Teresa Janevic, Steven N. Chillrud, Oscar Agyei, Carlos F. Gould, Alison G. Lee, and Kwaku Poku Asante

#### **Table of Contents**

**Table S1.** GRAPHS participants enrolled versus not enrolled in longitudinal cohort.

**Table S2.** GRAPHS participants included in longitudinal cohort.

**Table S3.** GRAPHS participants excluded from longitudinal cohort.

**Table S4.** Household cooking practices at child age 4 years amongst those enrolled in longitudinal follow up (n=690).

**Table S5.** Associations between GRAPHS stove intervention arm and age 4 blood pressure z-score, as compared to control.

**Table S6.** Exposure distribution by study arm for longitudinal cohort participants.

**Figure S1.** Counts of carbon monoxide (CO) measurements A) over pregnancy by gestational age in weeks; and B) over first year of life by child age in weeks.

**Figure S2.** Correlation matrix of carbon monoxide (CO) and fine particulate matter (PM<sub>2.5</sub>) exposures at different timepoints.

**Figure S3.** Intention to treat analyses with sensitivity adjustment for maternal blood pressure (BP).

**Figure S4.** Time-varying associations between prenatal household air pollution exposure, as represented by personal carbon monoxide (CO), and resting A) systolic blood pressure (SBP) and B) diastolic blood pressure (DBP) z-scores at age 4 years.

**Figure S5.** Time-varying associations between child household air pollution exposure, as represented by personal carbon monoxide (CO), and resting A) systolic blood pressure (SBP) and B) diastolic blood pressure (DBP) z-scores at age 4 years.

**Additional File-** Excel Document
